# Supplementary material for: Noncoding RNA-nucleated heterochromatin spreading is intrinsically labile and requires accessory elements for epigenetic stability
Source: eLife journal article supplement (doi:10.7554/elife.32948), 2018-07-18
Supplement: supp [file elife-32948-supp-v1.zip]

Archive with 16 entries (16 files):
- elife_poa_e32948_Figure_3_figure_supplement_1.pdf
- elife_poa_e32948_Figure_2_figure_supplement_2.pdf
- elife_poa_e32948_Figure_3_video_2.avi
- elife_poa_e32948_Figure_3_video_4.avi
- elife_poa_e32948_Figure_4_figure_supplement_1.pdf
- elife_poa_e32948_Figure_3_video_1.avi
- elife_poa_e32948_Figure_5_figure_supplement_1.pdf
- elife_poa_e32948_Figure_6_figure_supplement_1.pdf
- elife_poa_e32948_Figure_4_figure_supplement_2.pdf
- elife_poa_e32948_Figure_3_figure_supplement_2.pdf
- elife_poa_e32948_Figure_2_figure_supplement_1.pdf
- elife_poa_e32948_Source_code_1.txt
- elife_poa_e32948_Figure_3_video_3.avi
- elife_poa_e32948_Transparent_Reporting_File.pdf
- elife_poa_e32948_Figure_3_video_5.avi
- elife_poa_e32948_Figure_1_figure_supplement_1.pdf
