# Supplementary material for: Noncoding RNA-nucleated heterochromatin spreading is intrinsically labile and requires accessory elements for epigenetic stability
Source: eLife journal article supplement (doi:10.7554/elife.32948), 2018-07-18

Figure 2 Supplement 1

A wild-type MAT<sup>HSS</sup>, colors switched

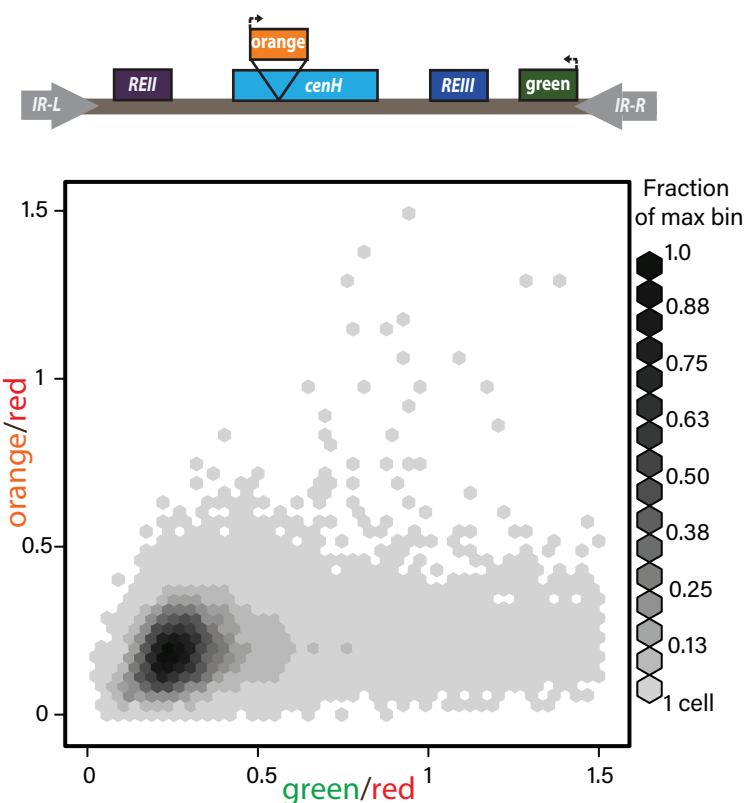

B *pcr1::KAN*

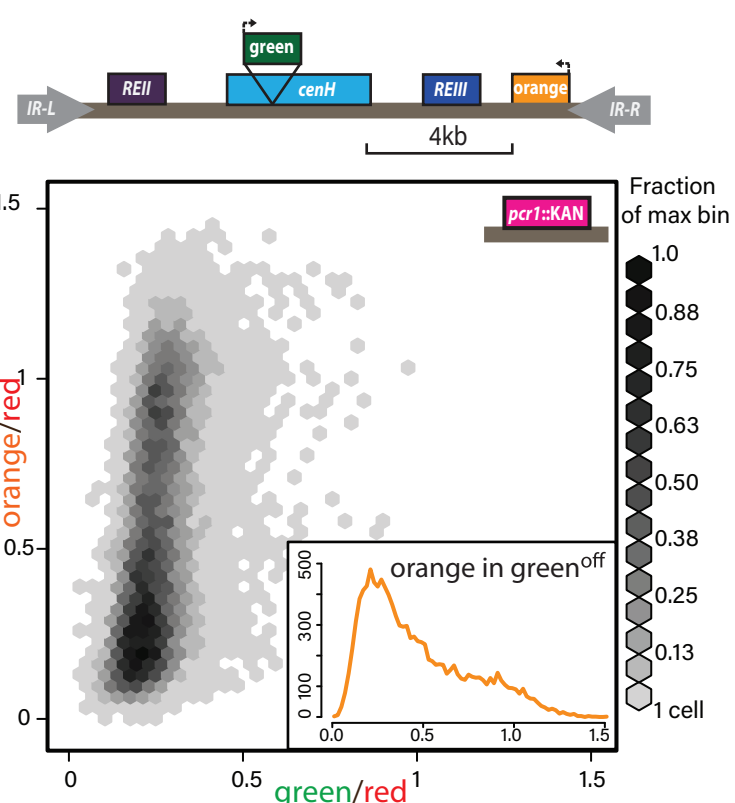

C *REII::LEU2* in  $\Delta K^{HSS}$

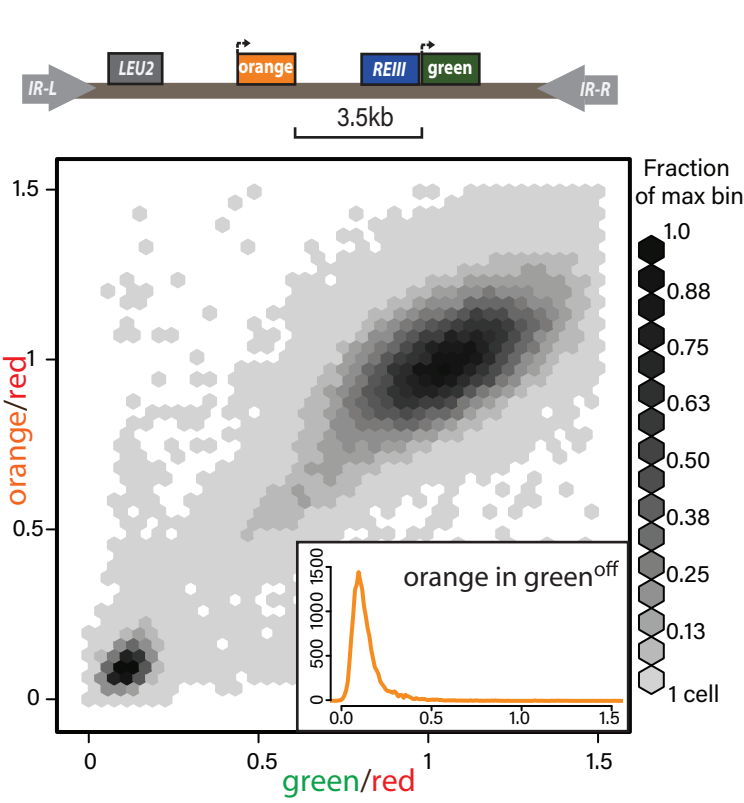

D *REIII* at *ura4* locus

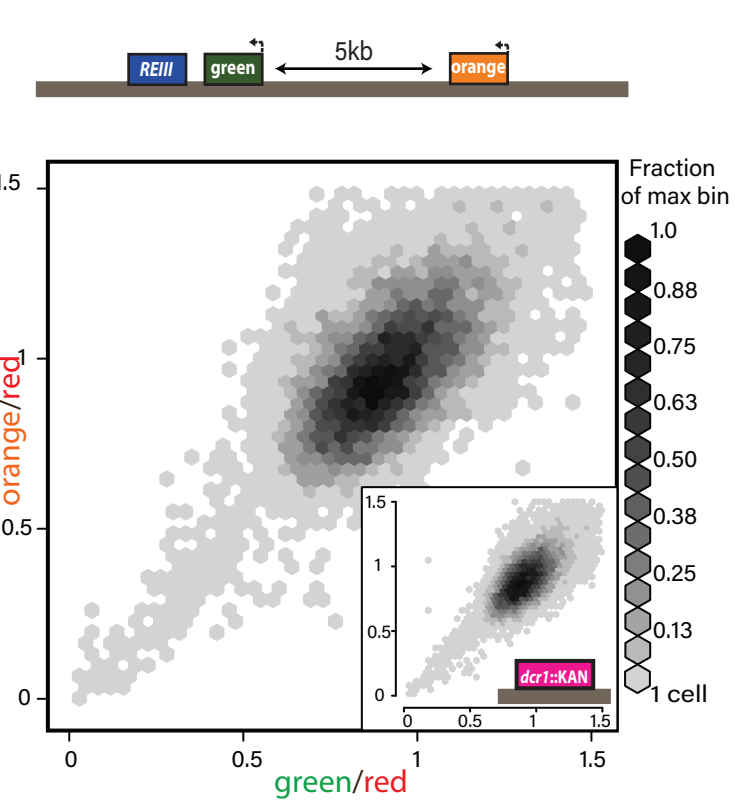

Supplement: supp [file elife-32948-supp-v1.zip › elife_poa_e32948_Figure_2_figure_supplement_1.pdf]
