# Supplementary figures and images for: Noncoding RNA-nucleated heterochromatin spreading is intrinsically labile and requires accessory elements for epigenetic stability
Source: eLife journal article supplement (doi:10.7554/elife.32948), 2018-07-18

**Figure 3 Supplement 1**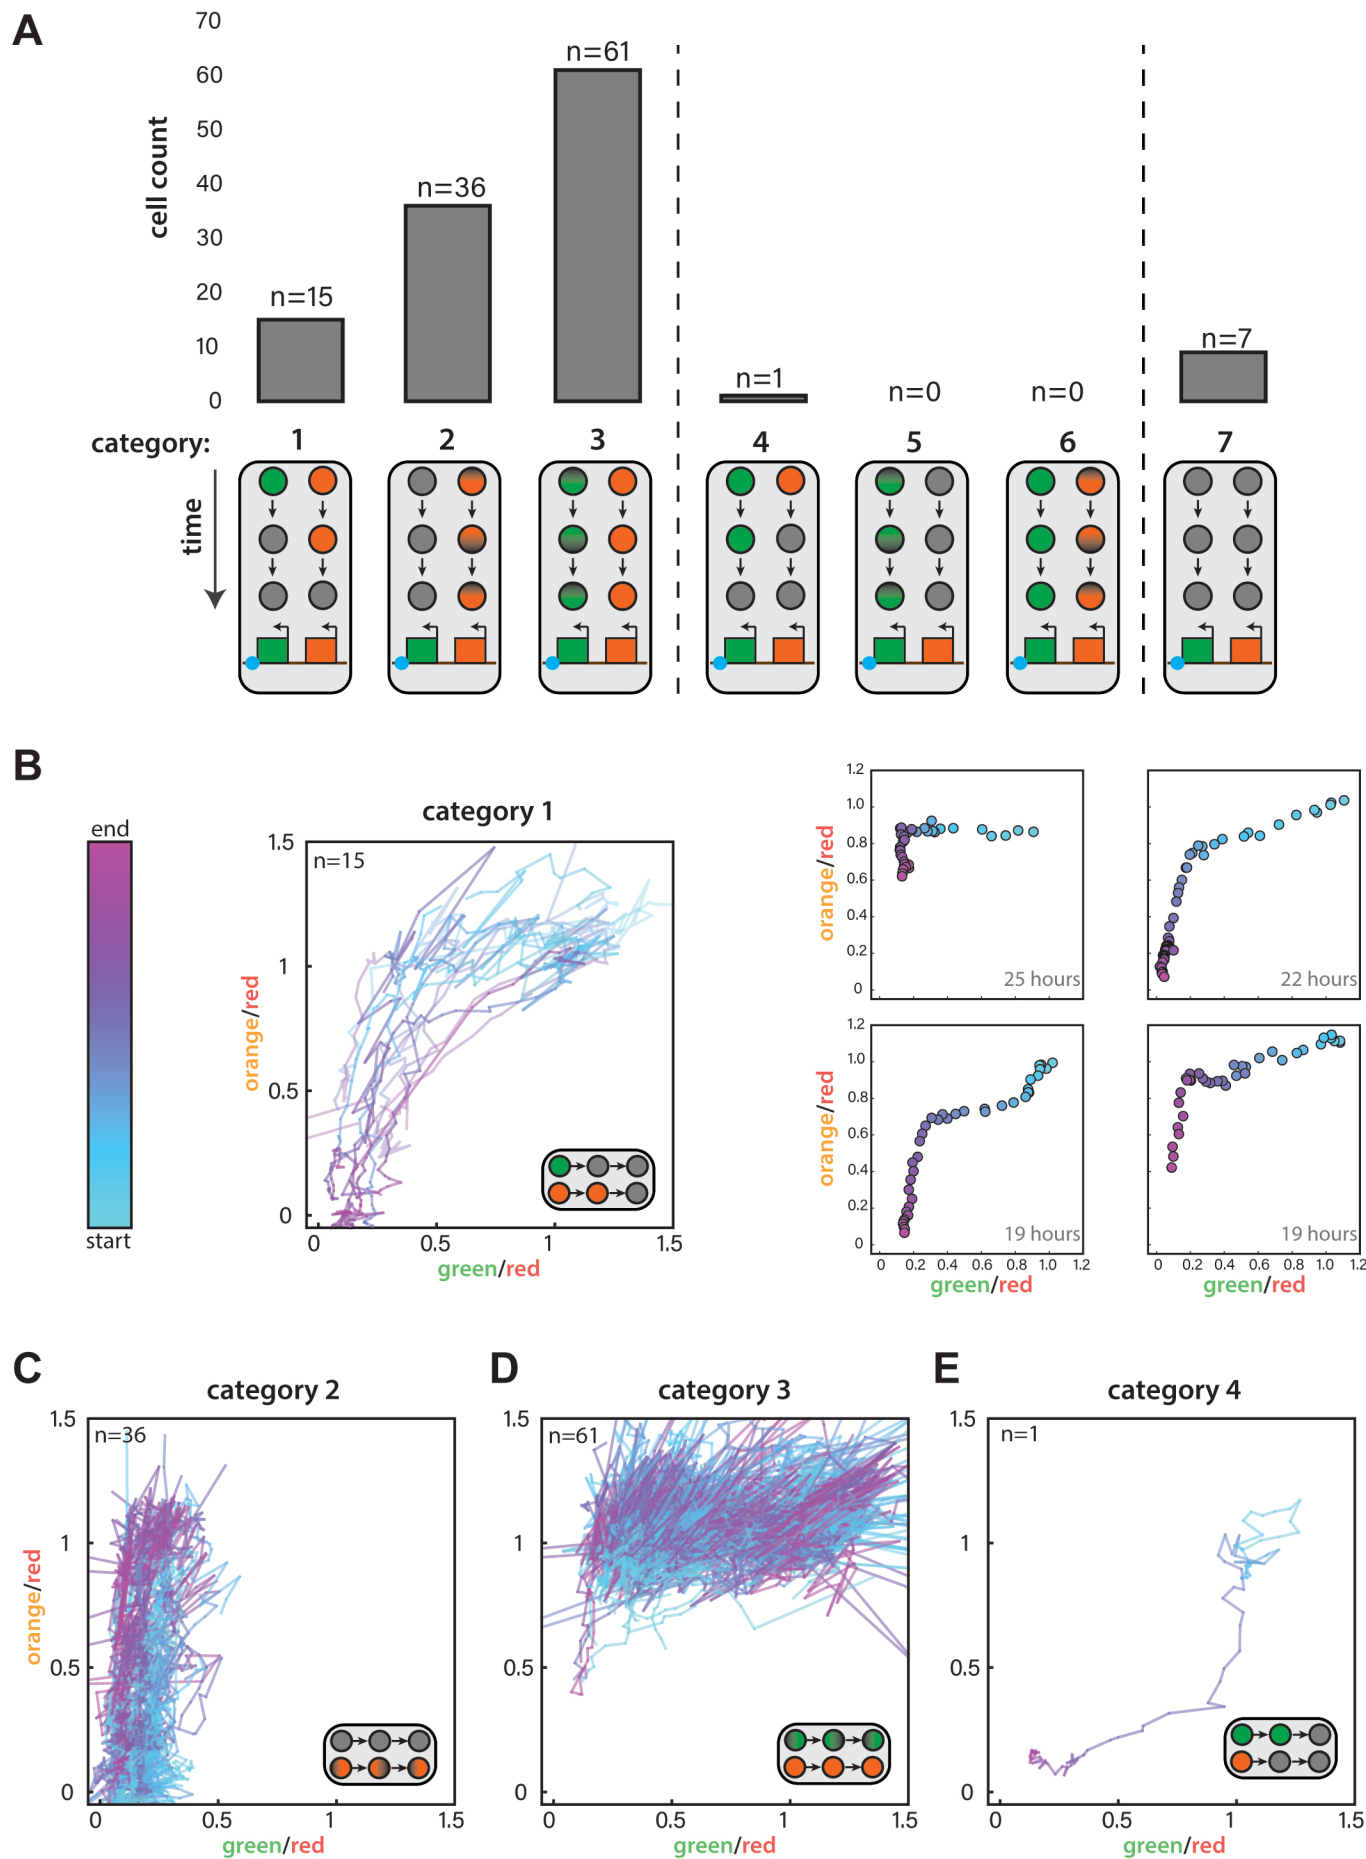

Supplement: supp [file elife-32948-supp-v1.zip › elife_poa_e32948_Figure_3_figure_supplement_1.pdf]

Figure 2 Supplement 2

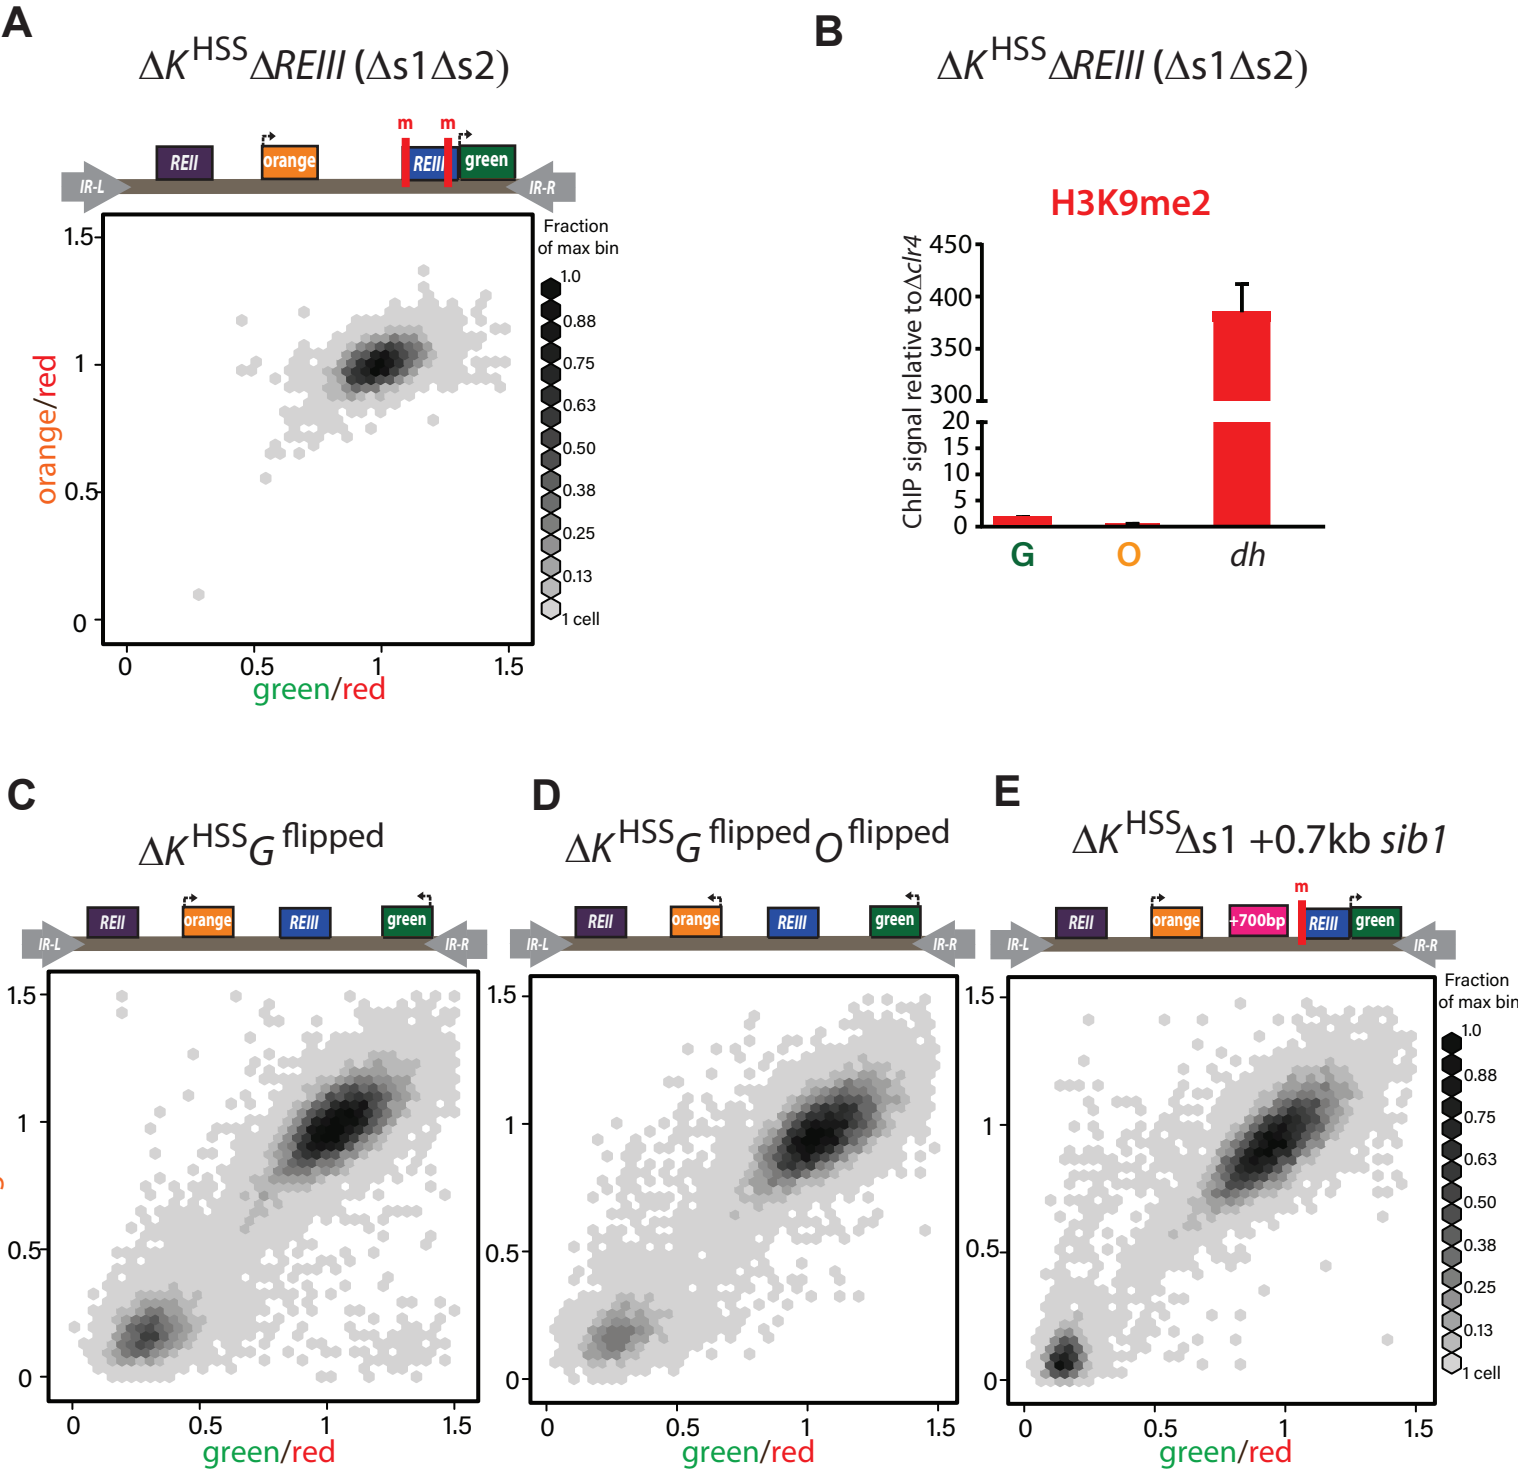

Supplement: supp [file elife-32948-supp-v1.zip › elife_poa_e32948_Figure_2_figure_supplement_2.pdf]

**Figure 4 Supplement 1**

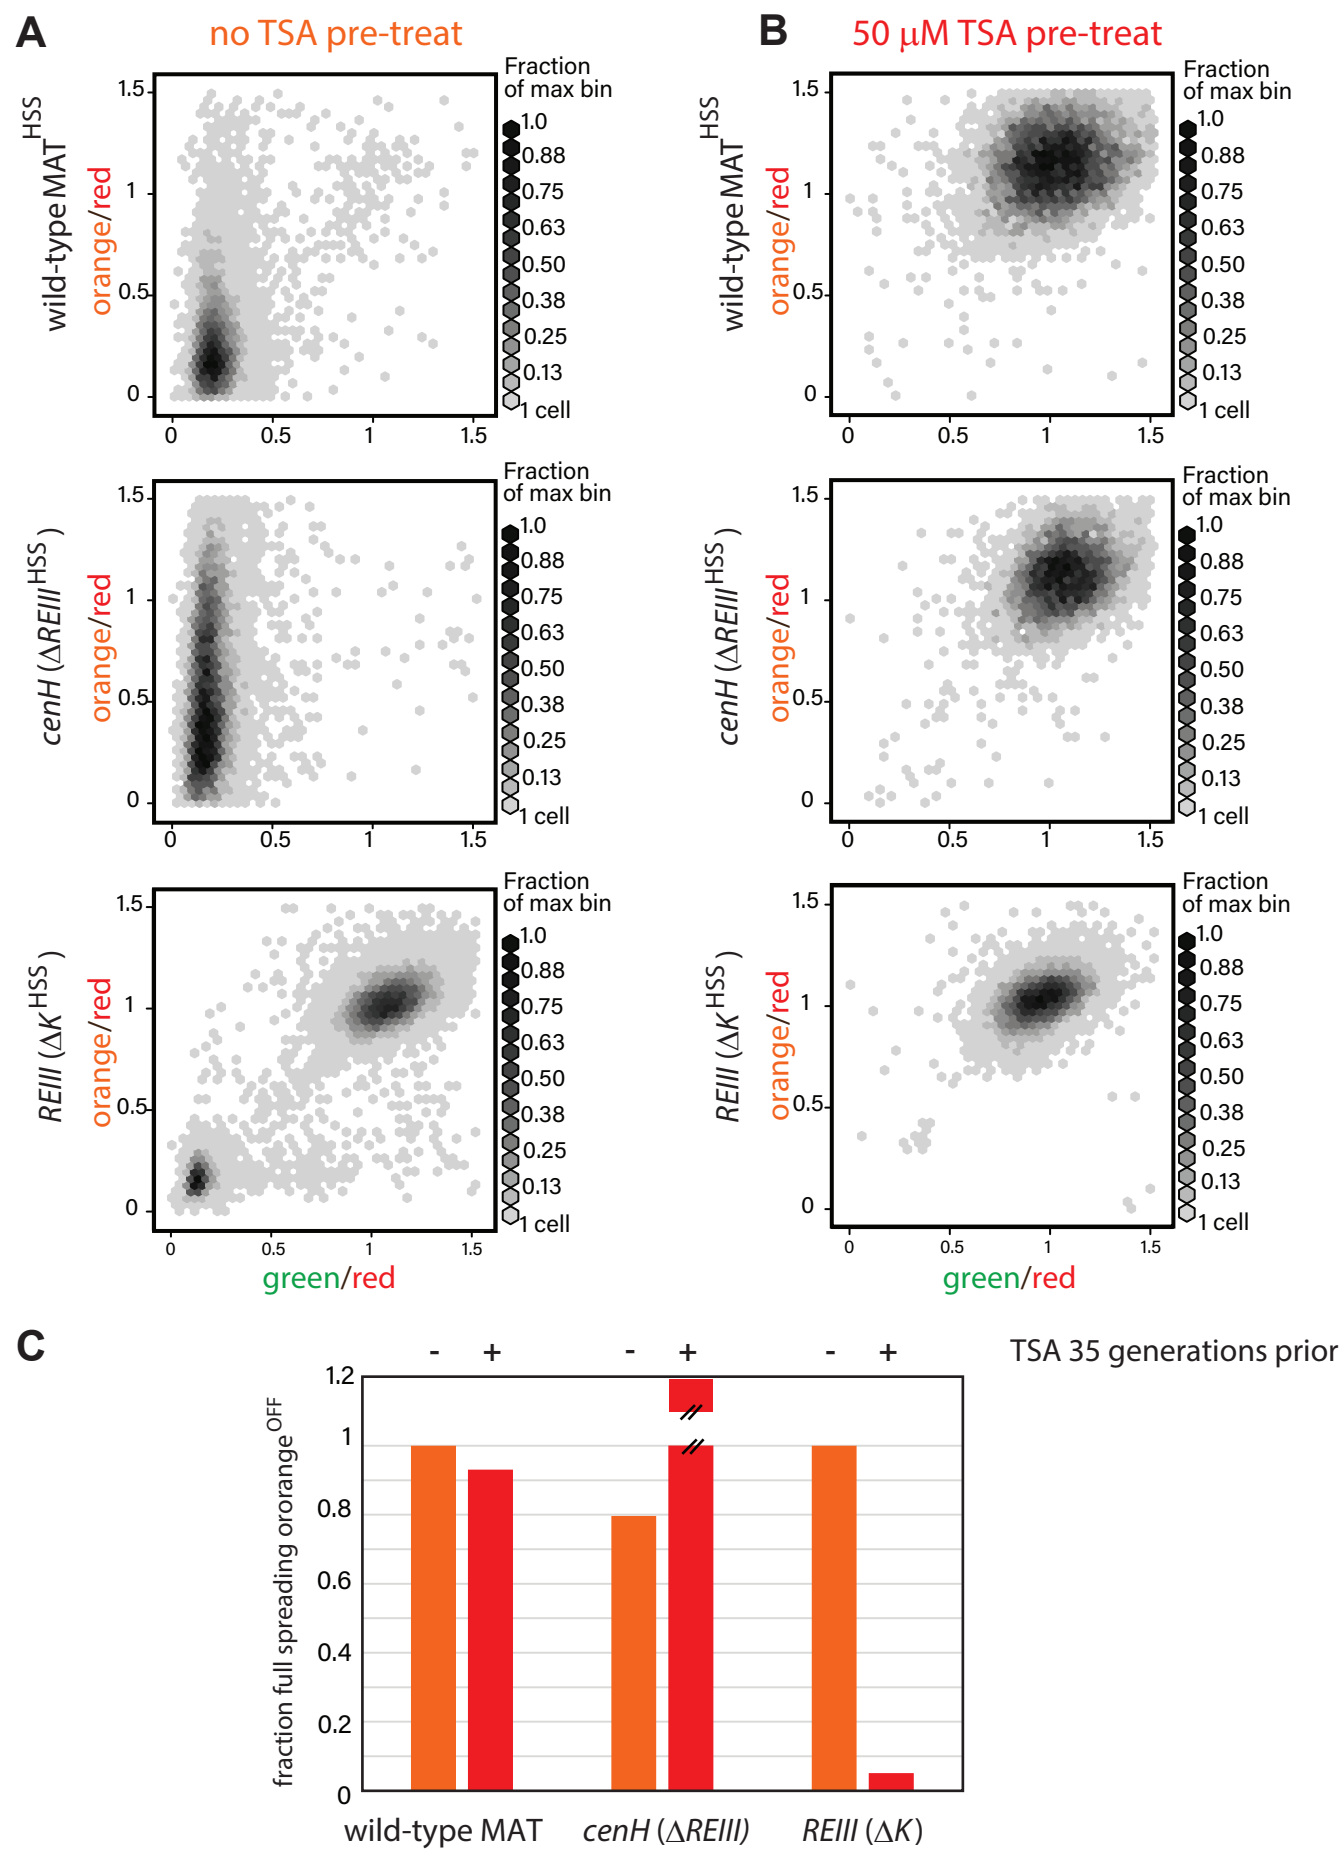

Supplement: supp [file elife-32948-supp-v1.zip › elife_poa_e32948_Figure_4_figure_supplement_1.pdf]

Figure 5 Supplement 1

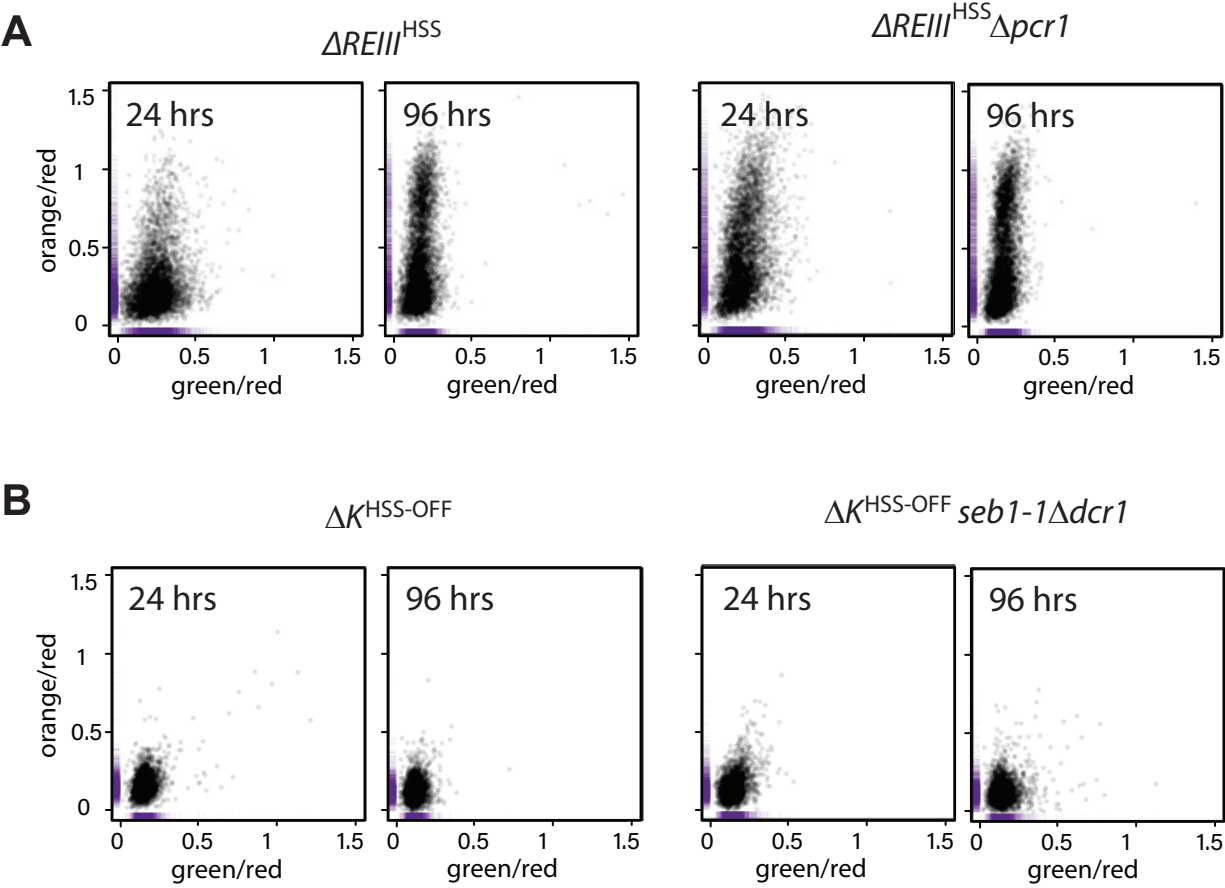

Supplement: supp [file elife-32948-supp-v1.zip › elife_poa_e32948_Figure_5_figure_supplement_1.pdf]

Figure 6 Supplement 1

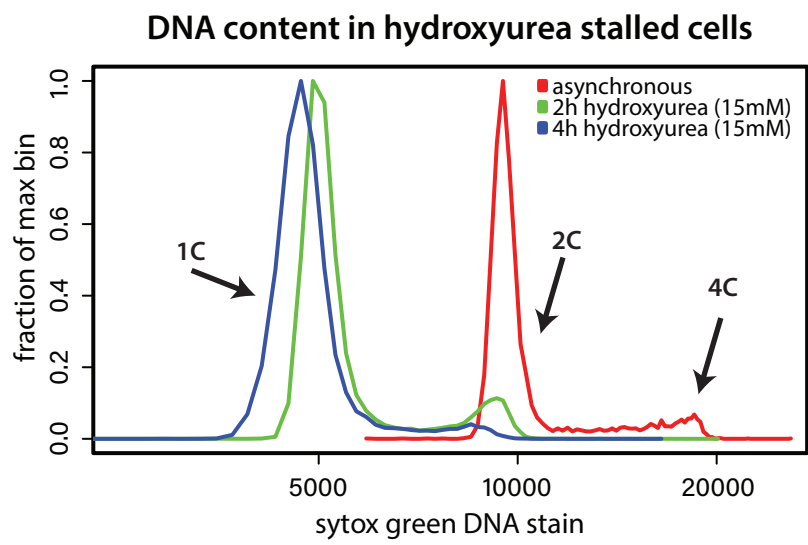

Supplement: supp [file elife-32948-supp-v1.zip › elife_poa_e32948_Figure_6_figure_supplement_1.pdf]

Figure 4 Supplement 2

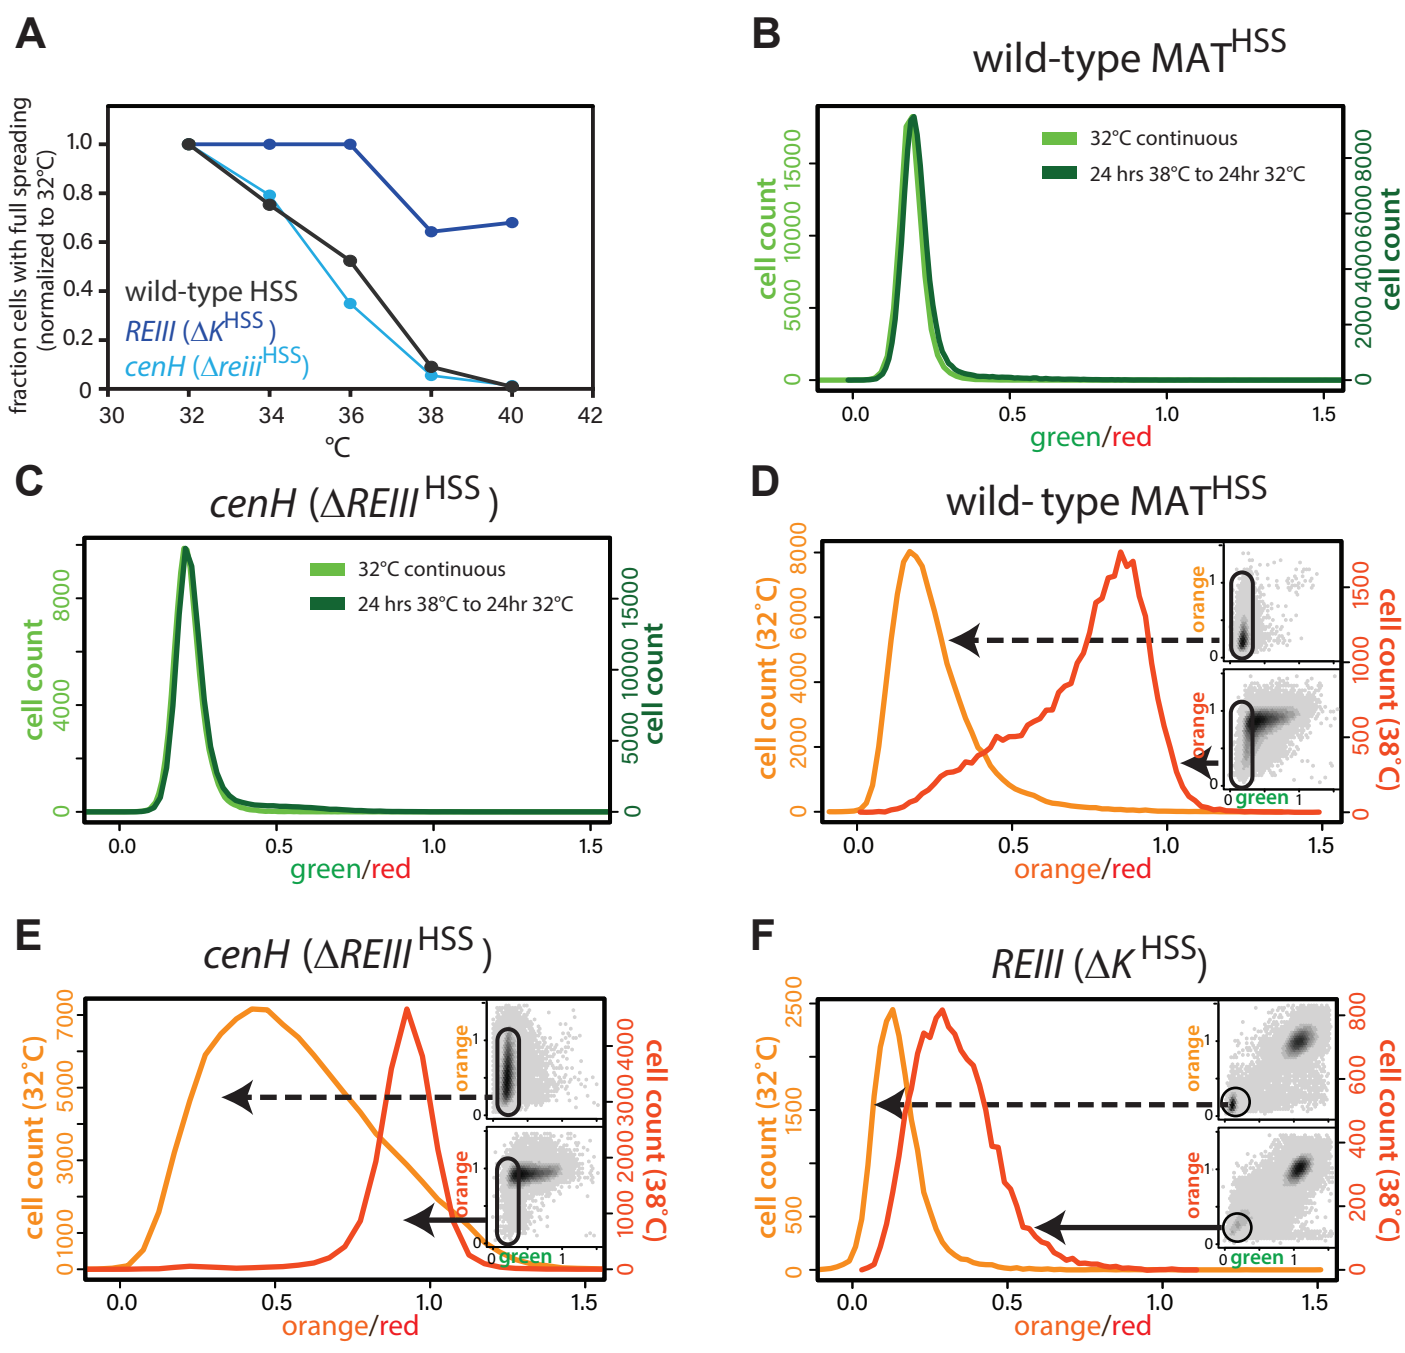

Supplement: supp [file elife-32948-supp-v1.zip › elife_poa_e32948_Figure_4_figure_supplement_2.pdf]

**Figure 3 Supplement 2**

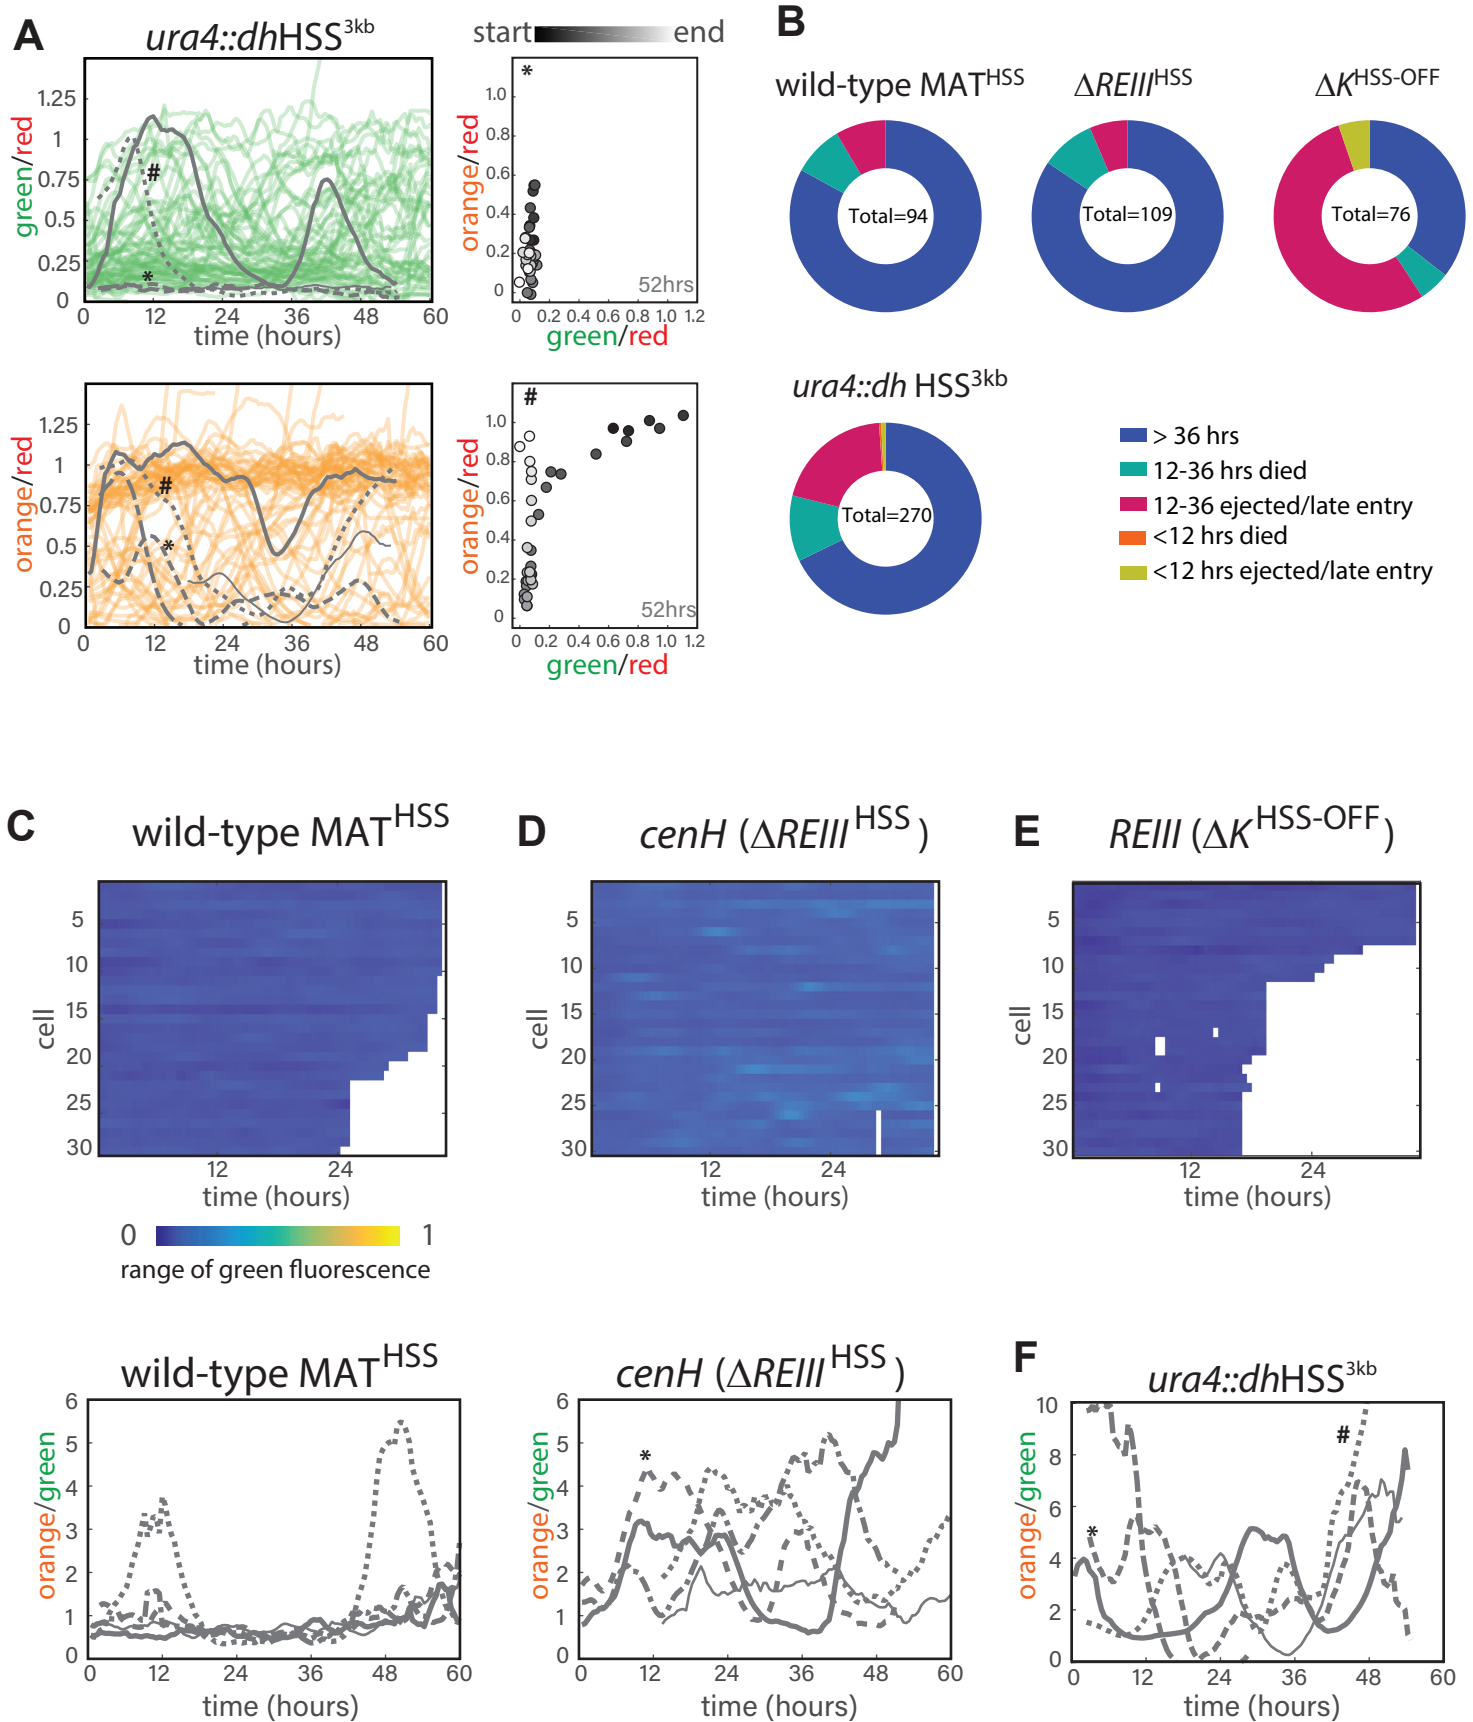

Supplement: supp [file elife-32948-supp-v1.zip › elife_poa_e32948_Figure_3_figure_supplement_2.pdf]

# Figure 1 Supplement 1

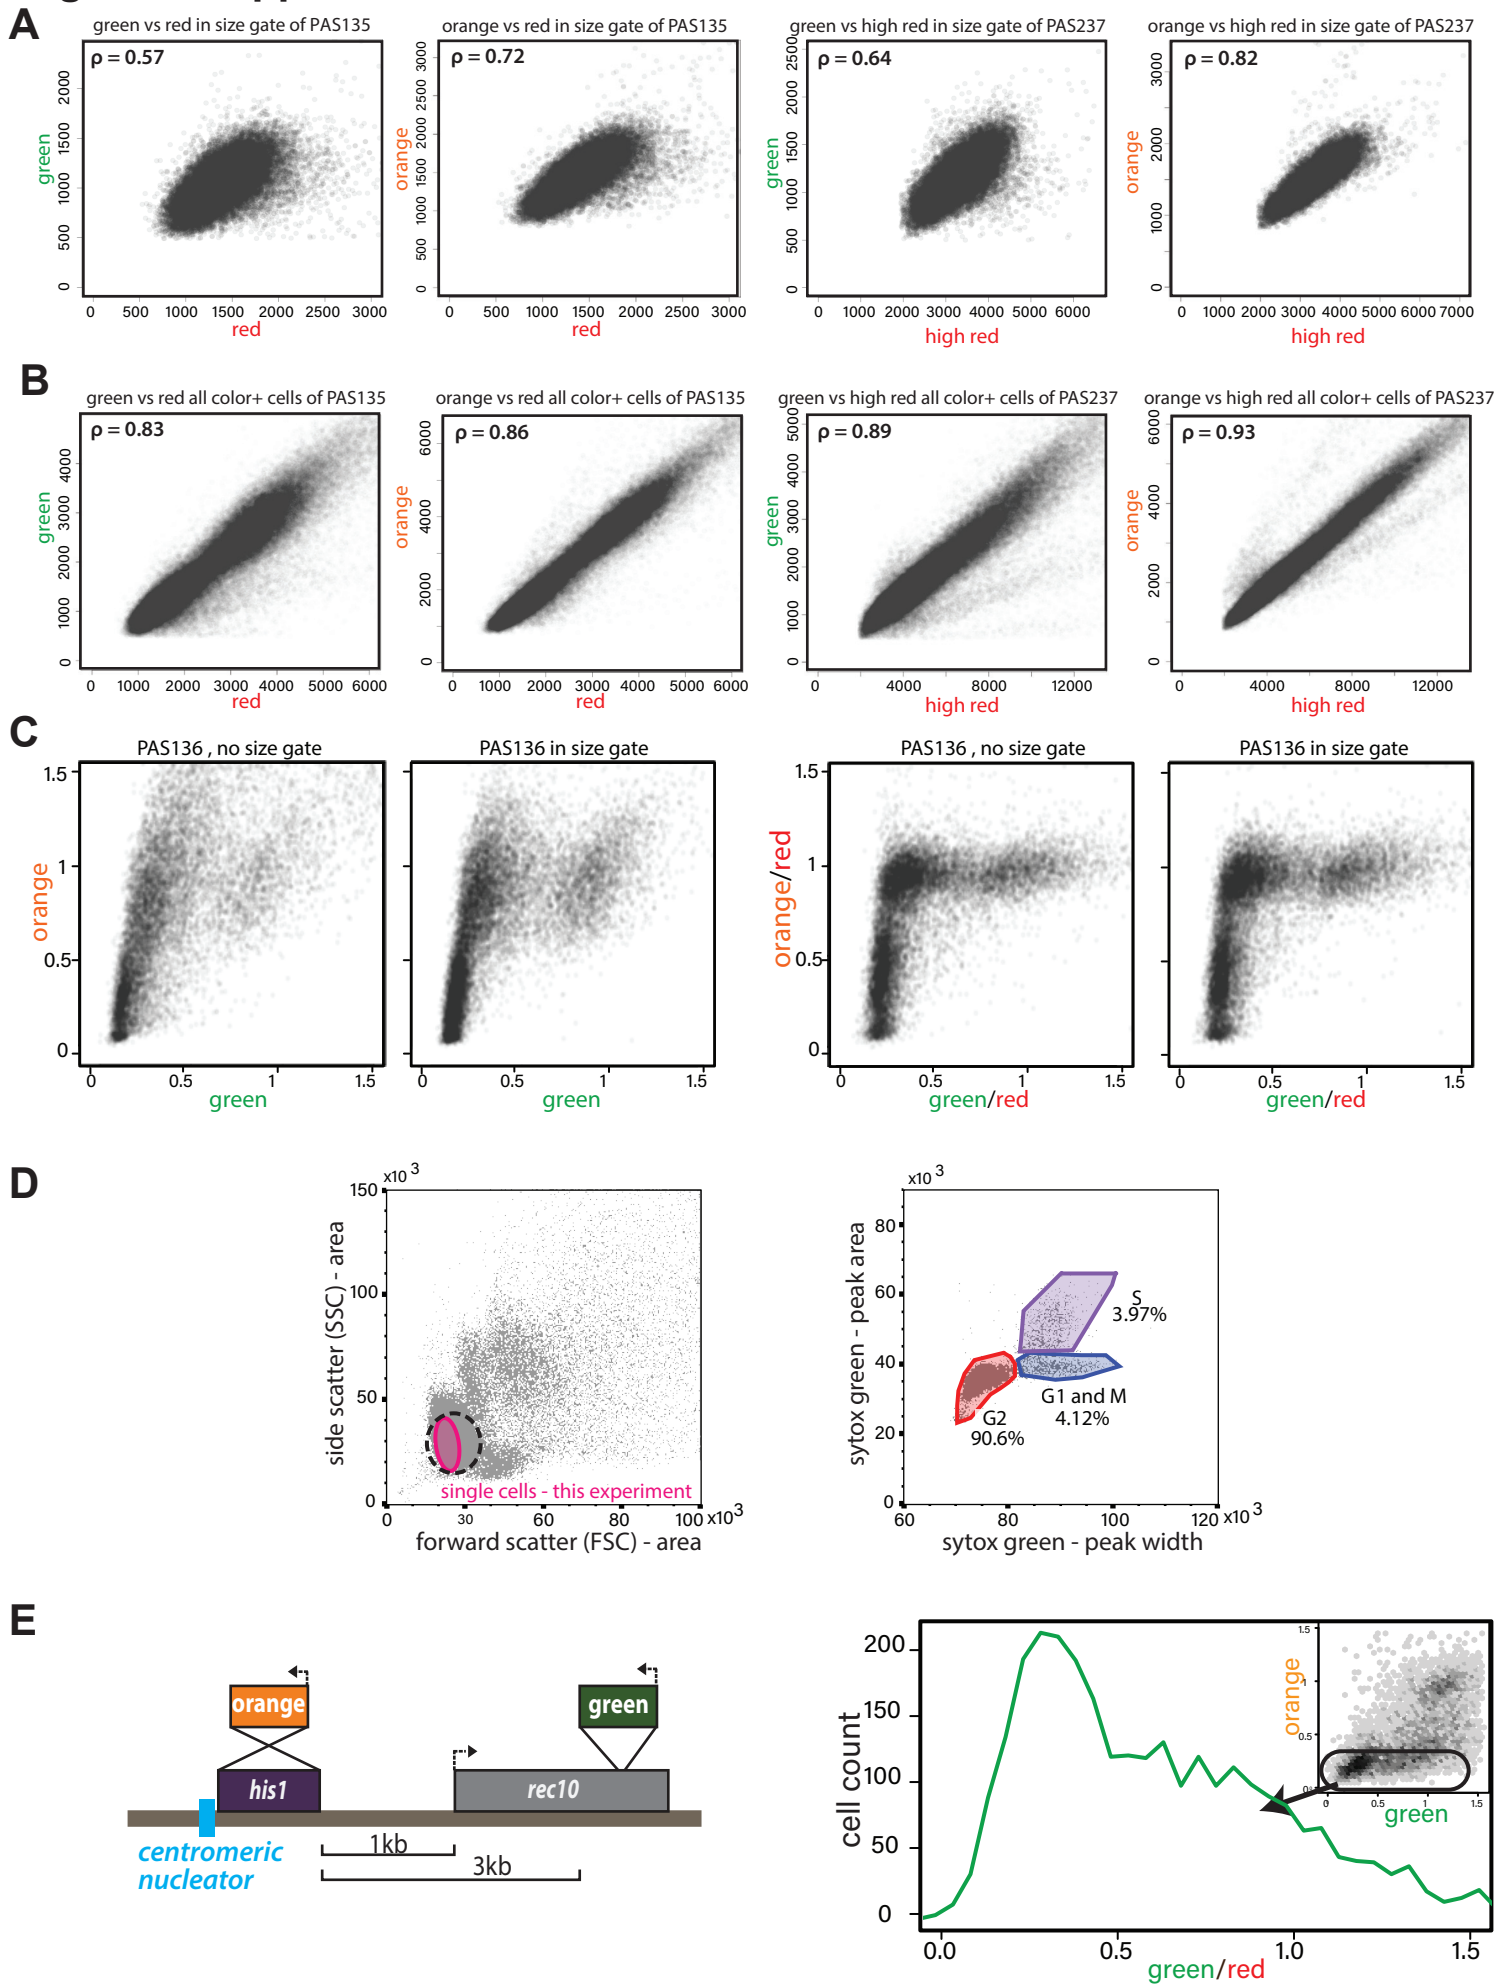

Supplement: supp [file elife-32948-supp-v1.zip › elife_poa_e32948_Figure_1_figure_supplement_1.pdf]
